# Supplementary material for: Rescue of failed oocyte activation after ICSI in a mouse model of male factor infertility by recombinant phospholipase Cζ
Source: PubMed Central journal article supplement — Mol Hum Reprod. 2015 Jul 17;21(10):783–91. doi: 10.1093/molehr/gav042 (PMC4586348; doi:10.1093/molehr/gav042), 2015-07-17
Supplement: supp_gav042_gav042supp_data.pdf [file supp_gav042_gav042supp_data.pdf]

**Table S1. Embryo development after ICSI with and without heat inactivated sperm.**

| Method of activation      | No. of surviving oocytes (exp.) | No. of oocytes activated (PN %) | No. of embryos developing to (%) |                                    |
|---------------------------|---------------------------------|---------------------------------|----------------------------------|------------------------------------|
|                           |                                 |                                 | 2-cell                           | Blastocyst                         |
| ICSI with fresh sperm     | 43 (3)                          | 43<br>100%                      | 36<br>83.7%                      | 22<br>51.2% <sup>a,b,c,d,e,f</sup> |
| ICSI with frozen sperm    | 45 (3)                          | 41<br>91.1%                     | 38<br>84.4%                      | 12<br>26.7% <sup>a</sup>           |
| ICSI + HT<br>2 min 30 sec | 27 (2)                          | 23<br>85.2%                     | 18<br>66.7%                      | 6<br>22.2% <sup>b</sup>            |
| ICSI + HT<br>5 minutes    | 47 (3)                          | 38<br>80.9%                     | 28<br>61.7%                      | 8<br>17% <sup>c</sup>              |
| ICSI + HT<br>10 minutes   | 49 (3)                          | 38<br>77.6%                     | 33<br>67.3%                      | 3<br>6.1% <sup>d</sup>             |
| ICSI + HT<br>20 minutes   | 48 (3)                          | 13<br>27%                       | 11<br>22.9%                      | 2<br>4.1% <sup>e</sup>             |
| ICSI + HT<br>30 minutes   | 47 (3)                          | 8<br>17%                        | 1<br>2%                          | 0 <sup>f</sup>                     |

HT = Heat treatment at 56°C

a, non-significant difference  $P= 0.268$   
b,c,d,e,f, represent a significant difference. ( $P= 0.0197, 0.007, 0.0038, 0.0023, 0.000$ ) respectively.  
Statistical analysis was performed by student's T test

**Table S2. Embryo development after ICSI with various activation protocols**

| ICSI method                               | No. Of surviving oocytes (exp.) | No. Of oocytes activated (PN) | No. Of embryos developing to (%) |                            |
|-------------------------------------------|---------------------------------|-------------------------------|----------------------------------|----------------------------|
|                                           |                                 |                               | 2-cell                           | Blastocyst                 |
| ICSI with fresh sperm                     | 43 (3)                          | 43<br>100%                    | 36<br>83.7%                      | 22<br>51.2% <sup>abc</sup> |
| ICSI with frozen sperm                    | 45 (3)                          | 41<br>91.1%                   | 38<br>84.4%                      | 12<br>26.7%                |
| Inactive ICSI* & 5µM Ionomycin            | 45 (3)                          | 36<br>80%                     | 26<br>57.8%                      | 6<br>13.3% <sup>ade</sup>  |
| Inactive ICSI* & 5mM Strontium            | 44(3)                           | 40<br>90.9%                   | 40<br>90.9%                      | 15<br>34.1% <sup>e</sup>   |
| Inactive ICSI & Nus-A hPLCζ injection     | 80 (3)                          | 77<br>96.3%                   | 68<br>85%                        | 29<br>36.3% <sup>cd</sup>  |
| ICSI fresh sperm & Nus-A hPLCζ injection  | 37 (3)                          | 36<br>97.3%                   | 28<br>78.4%                      | 17<br>45.9% <sup>b</sup>   |
| ICSI frozen sperm & Nus-A hPLCζ injection | 38 (3)                          | 35<br>92%                     | 29<br>76.3%                      | 17<br>44.7%                |

\*Inactive ICSI= Sperm with heat treatment at 56°C for 30mins

*a* significantly different ( $P= 0.009$ )

*b* no significant difference ( $P = 0.068$ )

*c* no significant difference ( $P = 0.079$ )

*d* significantly different ( $P = 0.008$ )

*e* significantly different ( $P =0.059$ )

Statistical analysis was performed by student's T test
